# Supplementary material
Source: Elsevier journal article supplement (https://www.sciencedirect.com/science/article/pii/S1575181318302602)
Supplement: mmc1 [file S1575181318302602:mmc1.pdf]

## MATERIAL ADICIONAL 2

### Temas de la “jornada Pecha Kucha” del curso académico 2016-17

|                                                                                 |
|---------------------------------------------------------------------------------|
| <b>Exploraciones del aparato cardiovascular</b>                                 |
| 1) ¿Cómo realizar e interpretar una gasometría?                                 |
| 2) ¿Cómo tomar tensión arterial e interpretarla?                                |
| 3) ¿Cómo se realiza el holter de tensión arterial y su interpretación?          |
| 4) ¿Cómo se realiza un electrocardiograma?                                      |
| 5) ¿Cómo se realiza un ecocardiograma tras torácico y sus indicaciones?         |
| 6) ¿Cómo se realiza un ecocardiograma trasesofágica y sus indicaciones?         |
| 7) ¿Cómo se realiza una prueba de esfuerzo y sus indicaciones?                  |
| 8) ¿Cómo se realiza un holter cardiaco y sus indicaciones?                      |
| 9) Cateterismo cardiaco. Técnica e indicación                                   |
| <b>Exploraciones del aparato respiratorio</b>                                   |
| 10) ¿Cómo se realiza una espirometría y qué es un peak-flow?                    |
| 11) ¿Cómo se interpreta una espirometría?                                       |
| 12) ¿Cómo se realiza una broncoscopia?                                          |
| Bloque 3                                                                        |
| 13) ¿Cuándo esta indicada la broncoscopia?                                      |
| 14) ¿Cómo se realiza una toracocentesis y biopsia pleural?                      |
| 15) ¿Cómo se interpreta los resultados de la toracocentesis?                    |
| <b>Exploraciones del aparato digestivo</b>                                      |
| 16) ¿Cómo se realiza la gastroscopia?                                           |
| 17) ¿Como se realiza una colonoscopia?                                          |
| 18) ¿Cómo se realiza una paracentesis?                                          |
| 19) ¿Cómo se interpreta una paracentesis?                                       |
| <b>Exploraciones del aparato locomotor</b>                                      |
| 20) ¿Cómo se realiza una artrocentesis?                                         |
| 21) ¿Cuáles son las indicaciones de la artrocentesis y su interpretación?       |
| <b>Exploraciones del sistema nervioso</b>                                       |
| 22) ¿Cómo se realiza una punción lumbar?                                        |
| 23) ¿Cómo se interpreta los resultados de la punción lumbar?                    |
| 24) ¿Cómo se realiza un electroencefalograma y cuando solicitarlo?              |
| 25) ¿Cómo se realiza un electromiograma?                                        |
| 26) ¿Cuándo se solicita un electromiograma?                                     |
| <b>Exploraciones generales</b>                                                  |
| 27) ¿Qué es la ecografía clínica de “bolsillo”?                                 |
| 28) ¿Cómo se realiza y se interpreta la prueba índice tobillo? (cardiovascular) |
| 29) ¿Indicaciones de una gammagrafía cardiaca? (cardiovascular)                 |
| 30) ¿Cómo se interpreta una radiografía de abdomen? (digestivo)                 |
| 31) ¿Cómo se interpreta un sedimento urinario? (generales)                      |
